# Supplementary material
Source: Research Square preprint supplement (doi:10.21203/rs.3.rs-9716953/v1)
Supplement: Supplementary file 1 [file d466a792d1280d7619338875.docx]

**Supplementary Information:**

**Table S1** Results of the full generalized linear mixed model (GLMM) examining whether press counts differed according to partner presence, box type (Hare vs. Stag), group identity (East vs. West), and session.

| **Predictor** | **β** | **SE** | **z** | **p** |
| --- | --- | --- | --- | --- |
| **Intercept** | **2.334** | **0.298** | **7.822** | **<0.001** |
| **Partner presence (present)** | **−0.411** | **0.176** | **−2.338** | **0.019** |
| **Box type (Stag)** | **−1.481** | **0.186** | **−7.955** | **<0.001** |
| **Group (West)** | **−1.338** | **0.424** | **−3.156** | **0.002** |
| **Session** | **0.124** | **0.028** | **4.476** | **<0.001** |
| **Partner × Box** | **0.753** | **0.245** | **3.076** | **0.002** |
| Partner × Group | 0.377 | 0.240 | 1.570 | 0.117 |
| Box × Group | 0.354 | 0.263 | 1.346 | 0.178 |
| **Partner × Box × Group** | **−0.743** | **0.355** | **−2.095** | **0.036** |

*ᵃ Negative binomial GLMM with log link. Press counts were modelled as a function of partner presence, box type, group identity, and session, including all interaction terms.*

*ᵇ Subject identity was included as a random intercept to account for repeated observations across sessions.*

*ᶜ The reference categories were partner absent, Hare box, and East group.*

*ᵈ Positive coefficients indicate increases in expected press counts on the log scale; negative coefficients indicate decreases relative to the reference category.*

*ᵉ Significant outcomes (p < 0.05) are shown in bold.*

**Table S2** Pairwise contrasts from estimated marginal means comparing press counts between partner-absent and partner-present conditions within each box type and group.

| **Box type** | **Group** | **RR (Absent/Present)** | **SE** | **z** | **p** |
| --- | --- | --- | --- | --- | --- |
| **Hare** | **East** | **1.51** | **0.265** | **2.34** | **0.019** |
| **Stag** | **East** | **0.71** | **0.121** | **−2.00** | **0.046** |
| Hare | West | 1.04 | 0.170 | 0.21 | 0.836 |
| Stag | West | 1.03 | 0.205 | 0.12 | 0.901 |

*ᵃ Pairwise contrasts were derived from estimated marginal means of the negative binomial GLMM with log link.*

*ᵇ Rate ratios (RR) represent the ratio of predicted press counts in the partner-absent condition relative to the partner-present condition within each box type and group.*

*ᶜ RR > 1 indicates higher predicted press counts when individuals were alone, whereas RR < 1 indicates higher predicted press counts when a partner was present.*

*ᵈ Significant results (p < 0.05) are shown in bold.*


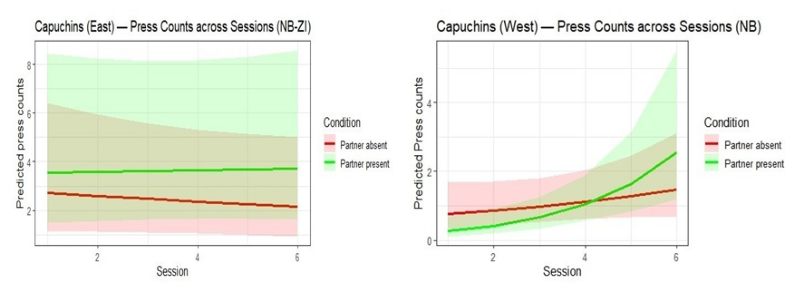


Fig. S1a Fig. S1b

**Fig. S1** Press counts across sessions under partner-present and partner-absent conditions in the Stag box. Predicted press counts (± 95% confidence intervals) are shown across sessions for capuchins in the East (Fig. S1a) and West (Fig. S1b) groups. Lines represent model-estimated values from generalized linear mixed models with negative binomial (East: zero-inflated negative binomial; West: negative binomial) error structures. Shaded areas indicate model-based confidence intervals. Predictions are plotted separately for partner-present and partner-absent conditions to assess sensitivity to a partner’s role across repeated sessions.

**Table S3** Results of negative binomial GLMMs examining effects of partner presence and session on Press counts in the Stag box.

| **Predictor** | **Estimate (East)** | **SE** | **z** | **p** | **Estimate (West)** | **SE** | **z** | **p** |
| --- | --- | --- | --- | --- | --- | --- | --- | --- |
| Intercept | **1.047** | **0.457** | **2.29** | **0.022** | −0.411 | 0.483 | −0.85 | 0.395 |
| Partner presence | 0.211 | 0.298 | 0.71 | 0.480 | **−1.347** | **0.631** | **−2.13** | **0.033** |
| Session | −0.046 | 0.054 | −0.84 | 0.399 | 0.132 | 0.103 | 1.28 | 0.201 |
| Partner presence × Session | 0.056 | 0.074 | 0.76 | 0.450 | **0.317** | **0.154** | **2.07** | **0.039** |

*ᵃ Negative binomial GLMM with log link.**Significant outcomes are shown in bold.
ᵇ Subject identity included as a random intercept.
ᶜ Session treated as a continuous predictor.
ᵈ The East Group model included a zero-inflation component.*


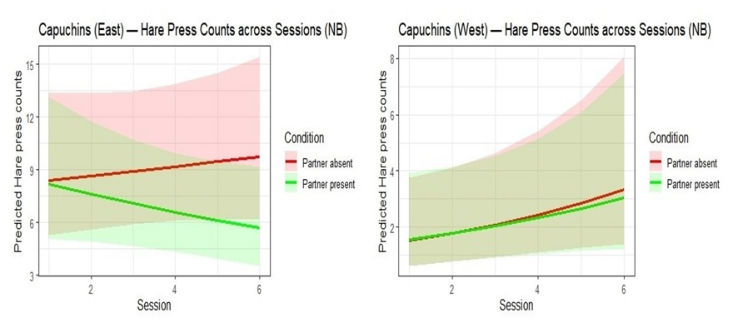


Fig. S2a Fig. S2b

**Fig. S2** Press counts across sessions under partner-present and partner-absent conditions in the Hare box. Predicted press counts (± 95% confidence intervals) are shown across sessions for capuchins in the East (Fig S2a) and West (Fig S2b) groups. Lines represent model-estimated values from generalized linear mixed models with negative binomial error structures. Shaded areas indicate model-based confidence intervals. Predictions are plotted separately for partner-present and partner-absent conditions to evaluate whether pressing behaviour in the solo (Hare) context varied as a function of partner presence over repeated sessions.

**Table S4** Results of negative binomial GLMMs examining effects of partner presence and session on Press counts in the Hare box.

| **Predictor** | **Estimate (East)** | **SE** | **z** | **p** | **Estimate (West)** | **SE** | **z** | **p** |
| --- | --- | --- | --- | --- | --- | --- | --- | --- |
| Intercept | **2.100** | **0.263** | **8.177** | **<0.001** | 0.262 | 0.510 | 0.514 | 0.607 |
| Partner presence | -0.05 | 0.255 | -0.199 | 0.842 | 0.045 | 0.495 | 0.091 | 0.927 |
| Session | 0.017 | 0.044 | 0.386 | 0.7 | 0.157 | 0.085 | 1.861 | 0.063 |
| Partner presence × Session | -0.074 | 0.066 | −1.143 | 0.253 | −0.024 | 0.124 | −0.194 | 0.846 |

*ᵃ Negative binomial GLMM with log link.**Significant outcomes are shown in bold.
ᵇ Subject identity included as a random intercept.
ᶜ Session treated as a continuous fixed predictor.*
